# Supplementary material for: Natural Variation in Arabidopsis thaliana as a Tool for Highlighting Differential Drought Responses
Source: PLoS One. 2008 Feb 27;3(2):e1705. doi: 10.1371/journal.pone.0001705 (PMC2246160; doi:10.1371/journal.pone.0001705)
Supplement: Table S1 — Experimental data. Measures performed on each individual plant are indicated: Electrolyte Leakage (%), Relative Water Content (%), Water Keeping Ability (%), Total Leaf Area (cm2), for control and stress treatment. Accessions are identified with their identification number in the INRA Versailles Resource Centre for Genomics (http://dbsgap.versailles.inra.fr/vnat/) and their common name. (0.03 MB XLS) [file pone.0001705.s001.xls]

## Sheet: Data
	Electrolyte leakage Control plant 1	Electrolyte leakage Control plant 2	Electrolyte leakage Control plant 3	Electrolyte leakage Stressed plant 1	Electrolyte leakage Stressed plant 2	Electrolyte leakage Stressed plant 3
accession	ELC1	ELC2	ELC3	ELS1	ELS2	ELS3
101AV/Ge-0	8.93953	7.6318	5.4538	3.5034	2.8312	2.765
157AV/Ita-0	16.5995	21.1962	12.764	3.294	2.9052	2.5851
162AV/Ct-1	3.71989	3.6123	5.89354	2.13592	2.34716	3.06577
163AV/Can-0	5.70184	5.5868	8.028	3.443	8.4489	4.6753
166AV/Cvi-0	3.42541	4.4633	4.2502	2.5632	2.7672	2.5587
172AV/Bur-0	4.55497	4.74912	3.73145	3.36364	2.32469	4.10497
180AV/Blh-1	4.02628	4.0873	4.19231	2.96578	2.4492	2.84141
186AV/Col-0	9.29653	5.1996	5.4083	3.5316	2.8519	2.8141
200AV/Gre-0	8.81307	7.53222	7.5981	5.6638	5.5956	5.6045
215AV/Mh-1	8.23732	5.38674	5.70578	2.58812	3.35512	2.72068
224AV/Oy-0	7.4443	6.1169	4.575	3.5963	2.8497	3.4569
236AV/Shadahra	12.6849	9.64981	12.8247	5.15033	9.00312	9.12152
252AV/Akita	4.17078	7.24694	5.28786	2.76775	4.62472	2.78781
257AV/Sakata	7.44427	6.11693	4.575	3.59631	2.84969	3.45691
25AV/Jea	5.08876	4.25703	3.80197	3.11333	2.64925	2.88485
266AV/N13	3.63937	3.83346	4.4679	2.33833	2.85714	3.33333
42AV/Bl-1	3.83682	4.7226	4.5342	2.5129	2.1767	2.3264
62AV/St-0	5.05739	7.8598	6.1721	3.375	2.0437	2.4212
70AV/Kn-0	5.62864	5.7376	4.1697	2.8931	2.7594	2.5362
83AV/Edi-0	4.07907	4.72709	5.63771	2.51121	2.98324	4.19319
8AV/Pyl-1	4.95955	4.83542	4.10355	1.9083	2.91034	3.83191
91AV/Tsu-0	4.55	3.45733	3.95349	2.73556	2.54511	2.80685
94AV/Mt-0	4.06422	5	3.9289	2.3429	1.5112	2.1712
96AV/An-1	4.59489	4.7108	5.1138	1.5476	2.7907	2.2203
	Relative water content control plant 1	Relative water content control plant 2	Relative water content control plant 3	Relative water content stressed plant 1	Relative water content stressed plant 2	Relative water content stressed plant 3
accession	RwcC1	RwcC2	RwcC3	RwcS1	RwcS2	RwcS3
101AV/Ge-0	82.301	84.672	87.644	80.6272	81.8123	78.6932
157AV/Ita-0	87.3679	86.077	87.3292	81.8928	83.1233	79.8444
162AV/Ct-1	82.8131	82.4948	81.5892	71.8161	75.3361	76.8586
163AV/Can-0	88.267	89.4402	88.7077	86.7855	88.4623	87.3092
166AV/Cvi-0	87.6513	88.2481	84.8485	86.768	87.3221	86.8637
172AV/Bur-0	84.9274	83.5067	84.0034	78.3556	84.7674	83.6102
180AV/Blh-1	84.8024	87.062	88.6315	80.3298	82.8762	81.1435
186AV/Col-0	81.1402	83.6686	80.522	79.6554	82.3438	84.3882
200AV/Gre-0	91.991	90.3668	88.2036	91.524	91.4781	90.5177
215AV/Mh-1	84.6897	85.3652	86.6051	86.5438	85.1671	83.953
224AV/Oy-0	83.0861	82.0968	83.1267	59.7628	69.3149	66.7981
236AV/Shadahra	85.3984	91.6033	87.5902	84.539	82.0251	87.0565
252AV/Akita	83.8734	87.301	84.0329	80.6713	83.4564	81.7556
257AV/Sakata	83.0168	83.6138	88.705	82.6338	82.0404	71.0804
25AV/Jea	82.2832	81.7786	81.4108	80.8515	81.8217	84.0248
266AV/N13	88.2116	84.5891	83.8741	78.6649	85.8513	80.8905
42AV/Bl-1	86.5412	85.1553	84.153	79.4222	82.139	80.3143
62AV/St-0	87.4136	88.7789	89.5745	85.0261	87.4673	86.092
70AV/Kn-0	82.5145	88.5219	79.8539	77.8243	80.9696	76.8804
83AV/Edi-0	86.0332	85.0019	86.3636	80.8634	81.1383	83.6978
8AV/Pyl-1	74.3426	82.5285	85.6446	83.0555	83.1072	80.9782
91AV/Tsu-0	87.203	83.346	86.1634	73.0733	70.4126	68.7911
94AV/Mt-0	87.772	89.3195	89.2165	88.9906	86.9378	85.1981
96AV/An-1	89.1513	87.7758	88.0048	85.724	87.9114	86.3964
	Water keeping ability control plant 1	Water keeping ability control plant 2	Water keeping ability control plant 3	Water keeping ability stressed plant 1	Water keeping ability stressed plant 2	Water keeping ability stressed plant 3
accession	WKA2-C1	WKA2-C2	WKA2-C3	WKA2-S1	WKA2-S2	WKA2-S3
101AV/Ge-0	28.5077	25.6386	27.4166	24.2456	23.9938	21.8495
157AV/Ita-0	21.5702	21.6573	20.81	19.5684	18.9684	18.0593
162AV/Ct-1	23.0598	21.1767	19.9862	19.7144	18.8106	17.23
163AV/Can-0	22.4449	22.0026	23.1195	23.4243	25.1735	27.817
166AV/Cvi-0	33.2368	36.6556	33.1144	27.5847	28.5465	32.1119
172AV/Bur-0	19.4885	21.0804	20.5329	19.9285	19.6039	17.4707
180AV/Blh-1	17.9706	23.2086	22.3726	18.9363	21.7949	17.5447
186AV/Col-0	24.103	24.6262	24.2784	24.2333	23.8883	23.3452
200AV/Gre-0	25.9807	27.5425	26.9767	23.5324	25.2378	21.2135
215AV/Mh-1	26.3198	26.1991	27.6094	24.7446	21.933	21.7021
224AV/Oy-0	25.1848	24.1938	25.0202	22.918	21.2113	20.3928
236AV/Shadahra	22.1664	24.9524	22.4863	23.1682	24.4136	19.539
252AV/Akita	19.5468	22.152	19.7692	18.6544	18.9501	21.1391
257AV/Sakata	21.5853	20.3721	21.1931	17.5309	19.0547	20.5665
25AV/Jea	20.2473	22.7021	22.784	22.6313	21.8899	20.3179
266AV/N13	22.1892	25.486	25.5338	20.3684	20.3098	19.8034
42AV/Bl-1	25.3773	24.1547	24.1676	20.496	20.2442	19.8822
62AV/St-0	25.8096	26.3389	28.0212	21.3178	23.0107	22.0219
70AV/Kn-0	23.9888	28.1685	24.0999	24.5267	23.5658	29.2527
83AV/Edi-0	23.1813	28.233	21.9043	22.7107	24.3141	22.629
8AV/Pyl-1	20.6591	20.8552	21.6873	19.313	22.0244	22.333
91AV/Tsu-0	24.3278	24.6985	27.0861	23.9705	23.7441	21.0668
94AV/Mt-0	23.9764	23.634	24.4124	21.6619	20.7584	22.043
96AV/An-1	25.793	24.7635	27.1511	25.4395	26.5717	24.4049
	Total leaf area control plant 1	Total leaf area control plant 2	Total leaf area control plant 3	Total leaf area control plant 4	Total leaf area stressed plant 1	Total leaf area stressed plant 2	Total leaf area stressed plant 3	Total leaf area stressed plant 4
accession	TLAC1	TLAC2	TLAC3	TLAC4	TLAS1	TLAS2	TLAS3	TLAS4
101AV/Ge-0	16.26	22.88	25.73	20.85	14.95	14.75	16.25	16.14
157AV/Ita-0	23.22	20.19	21.9	21.34	18.34	19.56	18.99	14.26
162AV/Ct-1	21.37	21.33	29.68	23.8	17.51	19.27	18.95	19.76
163AV/Can-0	32.87	31.93	32.47	28.51	21.09	26.57	23.71	18.04
166AV/Cvi-0	20.42	19.41	22.98	26.36	16.43	17.97	20.77	17.04
172AV/Bur-0	26.05	36.61	34.18	37.51	17.53	20.38	19.01	17.73
180AV/Blh-1	39.02	39.7	37.14	37.18	24.48	29.06	27.84	24.84
186AV/Col-0	20.66	23.22	25.93	23.41	13.11	18.54	18.91	19.08
200AV/Gre-0	35.14	37.72	39.94	34.34	27.97	31.17	28.12	24.65
215AV/Mh-1	40.6	46.06	35.01	33.82	26.86	24.98	26.64	18.9
224AV/Oy-0	30.44	28.39	31.09	25.28	18.89	24	21.69	24.39
236AV/Shadahra	27.69	16.33	24.38	30.5	16.81	7.61	16.68	17.29
252AV/Akita	34.66	35.2	28.69	37.02	23.77	23.39	27.09	20.08
257AV/Sakata	36.21	35.16	39.21	37.86	22.72	22.45	19.79	27.3
25AV/Jea	25.66	22.94	20.94	20.62	16.44	14.18	19.7	17.31
266AV/N13	15.2	20.8	16.32	23.32	15.05	16.04	19.12	16.14
42AV/Bl-1	19.84	20.02	21.59	18.88	16.9	21.47	20.35	18.29
62AV/St-0	38.94	30.55	36.62	30.76	28.64	31.28	29.76	27.73
70AV/Kn-0	32.3	32	35.56	29.75	22.8	25.44	20.21	19.04
83AV/Edi-0	25.2	40.61	35.75	25.48	24.14	25.14	23.56	26.58
8AV/Pyl-1	26.1	30.86	26.42	26.12	18.05	25.59	20.38	17.92
91AV/Tsu-0	31.22	36.49	38.41	36.25	30	29.69	32.76	23.57
94AV/Mt-0	44.83	60.31	50.27	51.32	30.18	33.52	37.29	33.2
96AV/An-1	20.88	28.6	31.62	31.57	23.15	27.33	23.61	21.49
