# Supplementary material for: Natural Variation in Arabidopsis thaliana as a Tool for Highlighting Differential Drought Responses
Source: PLoS One. 2008 Feb 27;3(2):e1705. doi: 10.1371/journal.pone.0001705 (PMC2246160; doi:10.1371/journal.pone.0001705)
Supplement: Table S2 — Means and Standard Deviations. Means and Standard Deviations are indicated for each character measured: Electrolyte Leakage (%), Relative Water Content (%), Water Keeping Ability (%), Total Leaf Area (cm2), for control and stress treatment. Accessions are identified with their identification number in the INRA Versailles Resource Centre for Genomics (http://dbsgap.versailles.inra.fr/vnat/) and their common name. (0.03 MB XLS) [file pone.0001705.s002.xls]

## Sheet: Mean SD
	Electrolyte leakage in well-watered plants Mean	Electrolyte leakage in well-watered plants Standard Deviation	Electrolyte leakage under water deficit Mean	Electrolyte leakage under water deficit Standard Deviation
accession	ELC	SD-ELC	ELS	SD-ELS
101AV/Ge-0	7.34171	1.76088	3.0332	0.408548
157AV/Ita-0	16.8532	4.22182	2.9281	0.355004
162AV/Ct-1	4.40858	1.28714	2.51629	0.487451
163AV/Can-0	6.43888	1.37742	5.5224	2.60825
166AV/Cvi-0	4.0463	0.548162	2.6297	0.1191
172AV/Bur-0	4.34518	0.540298	3.26443	0.894276
180AV/Blh-1	4.10196	0.0839815	2.75213	0.269615
186AV/Col-0	6.63481	2.30748	3.06587	0.403779
200AV/Gre-0	7.98113	0.721237	5.6213	0.0370741
215AV/Mh-1	6.44328	1.56185	2.88797	0.409956
224AV/Oy-0	6.0454	1.43599	3.30097	0.396975
236AV/Shadahra	11.7198	1.79403	7.75832	2.25937
252AV/Akita	5.56853	1.55716	3.39343	1.06638
257AV/Sakata	6.0454	1.43597	3.30097	0.39699
25AV/Jea	4.38258	0.652519	2.88248	0.232045
266AV/N13	3.98024	0.433327	2.84293	0.497655
42AV/Bl-1	4.36454	0.466628	2.33867	0.168435
62AV/St-0	6.3631	1.41093	2.6133	0.686124
70AV/Kn-0	5.17865	0.875471	2.72957	0.180311
83AV/Edi-0	4.81462	0.782995	3.22922	0.867551
8AV/Pyl-1	4.63284	0.462558	2.88352	0.962084
91AV/Tsu-0	3.98694	0.547102	2.69584	0.135316
94AV/Mt-0	4.33104	0.583274	2.00843	0.439091
96AV/An-1	4.8065	0.272368	2.1862	0.622251
	Relative water content in well-watered plants Mean	Relative water content in well-watered plants Standard deviation	Relative water content under water deficit Mean	Relative water content under water deficit Standard deviation
accession	RwcC	SD-RwcC	RwcS	SD-RwcS
101AV/Ge-0	84.8724	2.67714	80.3776	1.57446
157AV/Ita-0	86.9247	0.734371	81.6202	1.65637
162AV/Ct-1	82.299	0.635003	74.6703	2.58637
163AV/Can-0	88.805	0.59265	87.519	0.857884
166AV/Cvi-0	86.916	1.81519	86.9846	0.296158
172AV/Bur-0	84.1458	0.720964	82.2444	3.41711
180AV/Blh-1	86.832	1.92486	81.4498	1.30056
186AV/Col-0	81.7769	1.66714	82.1292	2.37367
200AV/Gre-0	90.1871	1.90006	91.1733	0.568221
215AV/Mh-1	85.5534	0.971452	85.2213	1.29625
224AV/Oy-0	82.7698	0.583214	65.2919	4.95093
236AV/Shadahra	88.1973	3.1467	84.5402	2.51567
252AV/Akita	85.0691	1.93455	81.9611	1.40386
257AV/Sakata	85.1119	3.12604	78.5849	6.50585
25AV/Jea	81.8242	0.437966	82.2326	1.62605
266AV/N13	85.5583	2.32548	81.8022	3.6789
42AV/Bl-1	85.2832	1.19921	80.6252	1.38483
62AV/St-0	88.589	1.09292	86.1951	1.22389
70AV/Kn-0	83.6301	4.44036	78.5581	2.14107
83AV/Edi-0	85.7996	0.71028	81.8998	1.56312
8AV/Pyl-1	80.8386	5.83742	82.3803	1.21456
91AV/Tsu-0	85.5708	1.99561	70.759	2.16198
94AV/Mt-0	88.7693	0.865245	87.0422	1.89839
96AV/An-1	88.3106	0.736983	86.6773	1.12038
	Total leaf area in well-watered plants Mean	Total leaf area in well-watered plants Standard	Total leaf area under water deficit Mean	Total leaf area under water deficit Standard
accession	TLAC	SD-TLAC	TLAS	SD-TLAS
101AV/Ge-0	21.43	3.98572	15.5225	0.782107
157AV/Ita-0	21.6625	1.2589	17.7875	2.4039
162AV/Ct-1	24.045	3.93023	18.8725	0.967484
163AV/Can-0	31.445	1.99422	22.3525	3.64334
166AV/Cvi-0	22.2925	3.10012	18.0525	1.91914
172AV/Bur-0	33.5875	5.21812	18.6625	1.31943
180AV/Blh-1	38.26	1.30026	26.555	2.24893
186AV/Col-0	23.305	2.1529	17.41	2.87552
200AV/Gre-0	36.785	2.55031	27.9775	2.66362
215AV/Mh-1	38.8725	5.63001	24.345	3.72574
224AV/Oy-0	28.8	2.61357	22.2425	2.53279
236AV/Shadahra	24.725	6.13017	14.5975	4.66571
252AV/Akita	33.8925	3.61229	23.5825	2.86602
257AV/Sakata	37.11	1.78746	23.065	3.11759
25AV/Jea	22.54	2.31954	16.9075	2.28166
266AV/N13	18.91	3.80755	16.5875	1.75855
42AV/Bl-1	20.0825	1.12269	19.2525	2.04796
62AV/St-0	34.2175	4.22212	29.3525	1.52987
70AV/Kn-0	32.4025	2.39291	21.8725	2.8504
83AV/Edi-0	31.76	7.67495	24.855	1.32226
8AV/Pyl-1	27.375	2.32794	20.485	3.58611
91AV/Tsu-0	35.5925	3.0711	29.005	3.87722
94AV/Mt-0	51.6825	6.41657	33.5475	2.91364
96AV/An-1	28.1675	5.05936	23.895	2.46438
	Water keeping ability in well-watered plants Mean	Water keeping ability in well-watered plants Standard Deviation	Water keeping ability under water deficit Mean	Water keeping ability under water deficit Standard Deviation
accession	WKAC	SD-WKAC	WKAS	SD-WKAS
101AV/Ge-0	27.1876	1.4482	23.363	1.31677
157AV/Ita-0	21.3458	0.466118	18.8654	0.759804
162AV/Ct-1	21.4076	1.54975	18.585	1.25746
163AV/Can-0	22.5223	0.562448	25.4716	2.21145
166AV/Cvi-0	34.3356	2.01014	29.4144	2.38514
172AV/Bur-0	20.3672	0.808769	19.001	1.33522
180AV/Blh-1	21.1839	2.81405	19.4253	2.16687
186AV/Col-0	24.3358	0.266307	23.8223	0.447689
200AV/Gre-0	26.8333	0.79068	23.3279	2.01991
215AV/Mh-1	26.7094	0.781729	22.7932	1.6939
224AV/Oy-0	24.7996	0.531039	21.5074	1.28838
236AV/Shadahra	23.2017	1.52459	22.3736	2.53256
252AV/Akita	20.4893	1.44417	19.5812	1.35725
257AV/Sakata	21.0502	0.619099	19.0507	1.51779
25AV/Jea	21.9111	1.44149	21.6131	1.18129
266AV/N13	24.403	1.91734	20.1605	0.310668
42AV/Bl-1	24.5665	0.70216	20.2075	0.308561
62AV/St-0	26.7232	1.1548	22.1168	0.850437
70AV/Kn-0	25.4191	2.38171	25.7817	3.04408
83AV/Edi-0	24.4395	3.34674	23.2179	0.950212
8AV/Pyl-1	21.0672	0.545908	21.2234	1.66166
91AV/Tsu-0	25.3708	1.49701	22.9272	1.61507
94AV/Mt-0	24.0076	0.390132	21.4878	0.659798
96AV/An-1	25.9026	1.19757	25.472	1.08377
